# Supplementary material for: Tuning the critical gelation temperature of thermo-responsive diblock copolymer worm gels
Source: Royal Society of Chemistry journal article supplement (doi:10.1039/c4py00856a), 2014-01-01
Supplement: c4py00856a1.pdf [file c4py00856a1.pdf]

## Supporting Information for:

### *Tuning the Critical Gelation Temperature of Thermo-responsive Diblock Copolymer Worm Gels*

Victoria J. Cunningham<sup>1</sup>, Liam P. D. Ratcliffe<sup>1</sup>, Adam Blanz<sup>1</sup>, Nicholas J. Warren<sup>1</sup>,  
Andrew Smith<sup>2</sup>, Oleksandr O. Mykhaylyk<sup>1,\*</sup> and Steven P. Armes<sup>1,\*</sup>

<sup>1</sup>*Department of Chemistry, University of Sheffield,  
Brook Hill, Sheffield, South Yorkshire, S3 7HF, UK.*

<sup>2</sup>*Diamond Light Source Ltd, Diamond House, Harwell Science and Innovation Campus,  
Didcot, Oxfordshire, OX11 0DE, UK*

#### **Synthesis of PGMA-PDEGMA diblock copolymers via RAFT aqueous dispersion polymerization**

A typical protocol for the synthesis of PGMA<sub>59</sub>-PDEGMA<sub>200</sub> diblock copolymer via RAFT aqueous dispersion polymerization is as follows. PGMA<sub>59</sub> macro-CTA (0.30 g) and DEGMA (1.17 g, 6.23 mmol) were weighed into a 25 ml round-bottom flask and purged with N<sub>2</sub> for 15 min. ACVA (3.0 mg, 0.011 mmol; CTA/ACVA molar ratio = 3.0) was added to the flask and the mixture was degassed for 5 min. Water (13.21 ml, 10 wt %), was degassed separately for 30 min and added to the mixture, which was stirred until homogeneous and degassed for a further 10 min prior to immersion in an oil bath at 70 °C for 16 h. The resulting copolymer was analyzed by DMF GPC ( $M_n = 66,000$  g mol<sup>-1</sup>,  $M_w/M_n = 1.52$  vs. PMMA standards).

**Table S1.** Summary of conversions, molecular weights and polydispersities obtained for a PGMA<sub>59</sub> macro-CTA precursor and various PGMA<sub>59</sub>-PDEGMA diblock copolymers (where G = PGMA and D = DEGMA).

| Target Diblock Composition                        | Conversion <sup>a</sup> (%) | $M_n^b$ | $M_w/M_n^b$ |
|---------------------------------------------------|-----------------------------|---------|-------------|
| <b>G<sub>59</sub> macro-CTA</b>                   | -                           | 16,000  | 1.18        |
| <b>G<sub>59</sub>-D<sub>100</sub></b>             | >99                         | 36,400  | 1.22        |
| <b>G<sub>59</sub>-D<sub>120</sub></b>             | 98                          | 42,200  | 1.24        |
| <b>G<sub>59</sub>-D<sub>140</sub></b>             | 97                          | 47,000  | 1.33        |
| <b>G<sub>59</sub>-D<sub>160</sub></b>             | 98                          | 52,300  | 1.40        |
| <b>G<sub>59</sub>-D<sub>180</sub></b>             | >99                         | 59,000  | 1.47        |
| <b>G<sub>59</sub>-D<sub>200</sub></b>             | >99                         | 66,000  | 1.52        |
| <b>G<sub>59</sub>-D<sub>220</sub></b>             | >99                         | 70,300  | 1.98        |
| <b>G<sub>59</sub>-D<sub>300</sub></b>             | >99                         | 110,000 | 3.68        |
| <b>G<sub>59</sub>-D<sub>400</sub></b>             | 98                          | 154,100 | 31.79       |
| <b>G<sub>59</sub>-D<sub>400</sub><sup>c</sup></b> | >99                         | 74,200  | 1.13        |

- Monomer conversion determined by <sup>1</sup>H NMR spectroscopy
- Determined by GPC using DMF eluent and a series of near-monodisperse poly(methyl methacrylates) as calibration standards
- After purification of DEGMA monomer using silica column chromatography (see also Figure S1 below).

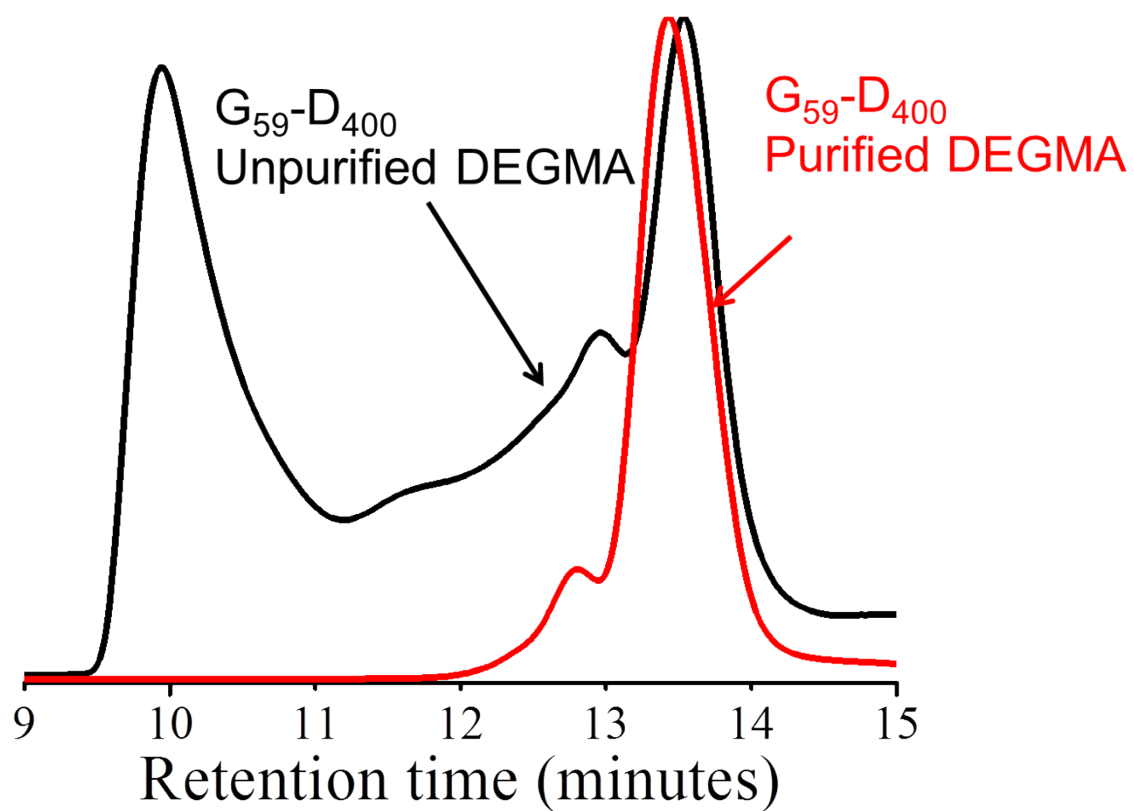

**Figure S1.** DMF GPC curves obtained for  $PGMA_{59}-PDEGMA_{400}$  diblock copolymers synthesised using either unpurified DEGMA monomer (Aldrich, 95%) or DEGMA purified by silica column chromatography (where G = PGMA and D = PDEGMA).
